# Supplementary material for: The first three-fold interpenetrated framework with two different four-connected uniform nets of 66 dia and new chiral 86 mdf networks
Source: Royal Society of Chemistry journal article supplement (doi:10.1039/c0cc02131h), 2010-01-01
Supplement: c0cc02131h.pdf [file c0cc02131h.pdf]

## Electronic Supplementary Information

### The first three-fold interpenetrated framework with two different four-connected uniform nets: $6^6$ dia net and new chiral $8^6$ mdf net

Zhi-Long Wang,<sup>a</sup> Wei-Hui Fang<sup>a</sup> and Guo-Yu Yang<sup>\*ab</sup>

<sup>a</sup> State Key Laboratory of Structural Chemistry, Fujian Institute of Research on the Structure of Matter, Chinese Academy of Sciences, Fuzhou, Fujian 350002, China. E-mail: ygy@fjirsm.ac.cn

<sup>b</sup> MOE Key Laboratory of Cluster Science, Department of Chemistry, Beijing Institute of Technology, Beijing 100081, China. E-mail: ygy@bit.edu.cn

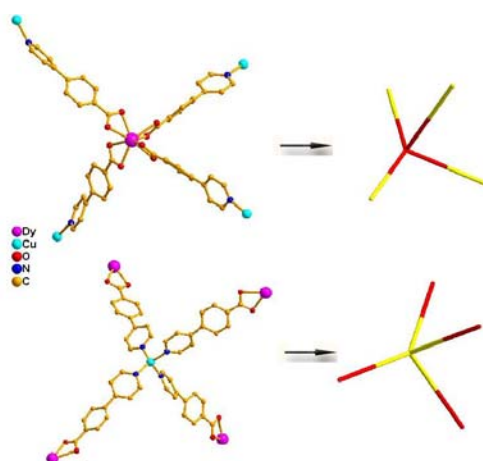

Figure S1. Each  $\text{Dy}^{3+}$  and  $\text{Cu}^+$  ion could be considered as a four-connected node.

**Optical properties:** The photoluminescence property of **1**, the  $\text{L}^-$  ligand and **2** has been explored at room temperature in the solid state under excitation of 405 nm, 329nm and 484nm, respectively.

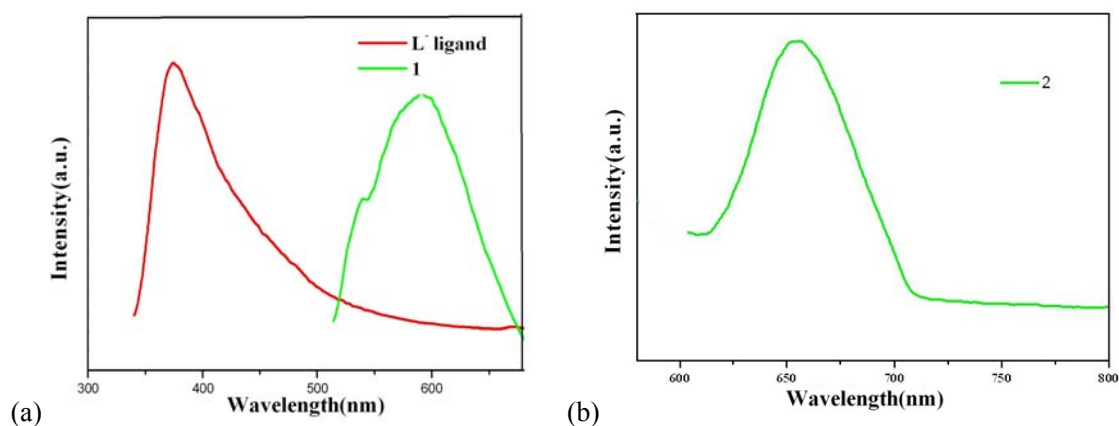

Fig. S2 (a) Emission spectrum of **1** and the  $\text{L}^-$  ligand. (b) Emission spectrum of **2**

**Thermal Analysis:** The thermal analysis was performed on Netzsch STA449C under the flowing nitrogen atmosphere. **1** and **2** was heated from room temperature to 1000 °C at a heating rate of 10 °C/min.

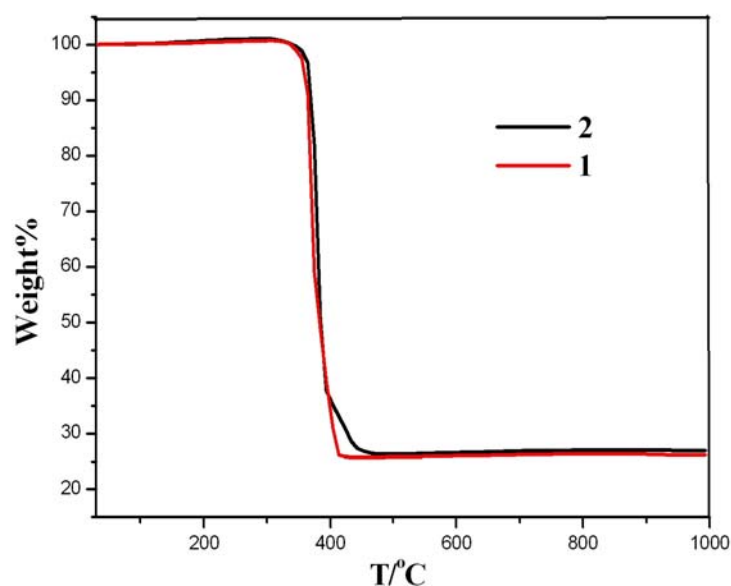

**Figure S3.** The TGA diagram of **1** and **2**.

There is one step weight loss from 360 to 440 °C. Assuming that the residue corresponds to  $\text{Ln}_2\text{O}_3$  and  $\text{CuO}$  the observed weight (26.3% for **1**, 26.8% for **2**) is in good agreement with the calculated value (26.1% for **1**, 26.4% for **2**).

**X-ray powder diffraction:** X-ray powder diffraction experiments were performed on a PANalytical X'pert PRO diffractometer with  $\text{Cu K}\alpha$  radiation (40 kV, 40 mA) was used to identify the crystal structure of the sample. The measurement was conducted in the continuous scanning mode. The  $2\theta$  scanning range was from 5° to 50° in steps of 0.02° with a collection time of 12 s per step.

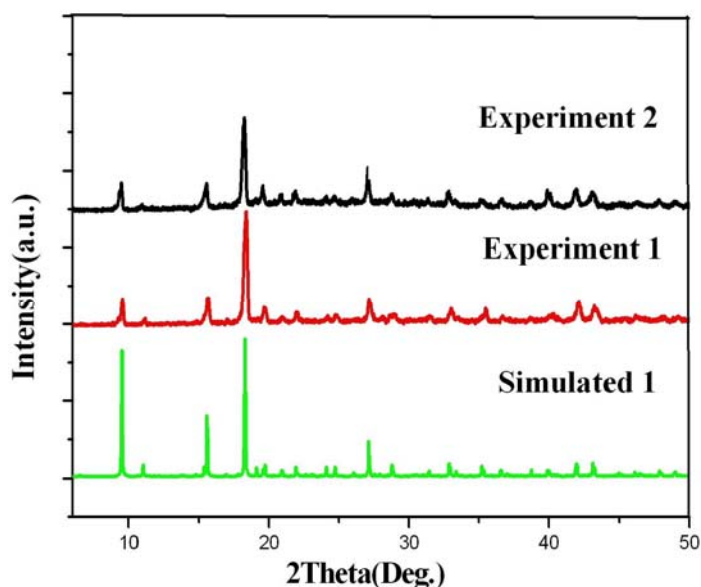

**Figure S4.** Simulated PXR D patterns of **1** and experimental PXR D patterns of **1** and **2**.

**IR spectroscopy:** The IR spectra of **1** and **2** are similar. The characteristic features of the  $L^-$  ligand dominate the IR spectrum. The strong vibrations appearing at 1589 and 1418  $\text{cm}^{-1}$  correspond to the asymmetric and symmetric stretching vibrations of the carboxylate group, respectively. The absence of strong bands in the range 1690–1730  $\text{cm}^{-1}$  indicate IN ligands are deprotonated

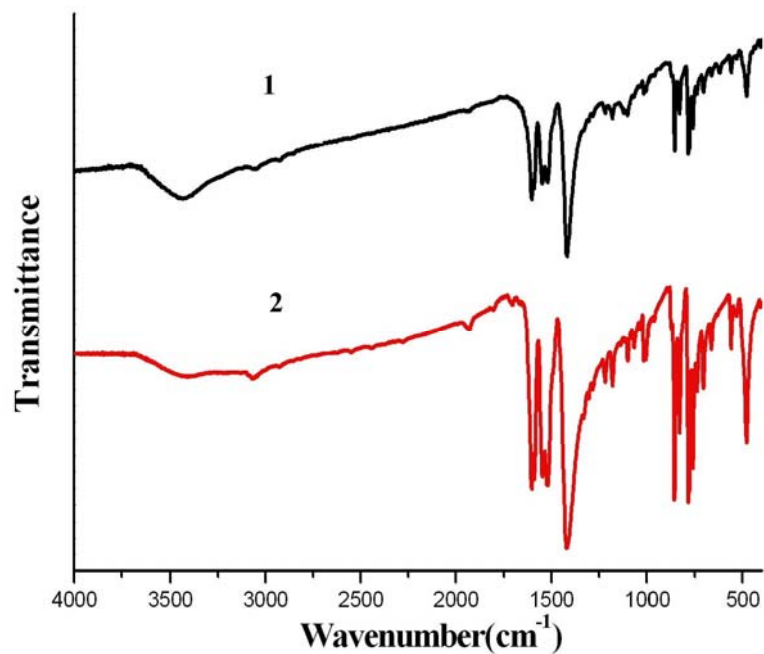

**Figure S5.** IR spectra of **1** and **2**.
